# Supplementary material for: Detecting triplet states in opto-electronic and photovoltaic materials and devices by transient optically detected magnetic resonance
Source: Royal Society of Chemistry journal article supplement (doi:10.1039/d1mh00999k), 2021-01-01
Supplement: d1mh00999k1.pdf [file d1mh00999k1.pdf]

## SUPPORTING INFORMATION

for

### Detecting triplet states in opto-electronic and photovoltaic materials and devices by transient optically detected magnetic resonance

Jeannine Grüne, Vladimir Dyakonov and Andreas Sperlich\*

Experimental Physics 6, Julius Maximilian University of Würzburg,  
Am Hubland, 97074 Würzburg, Germany

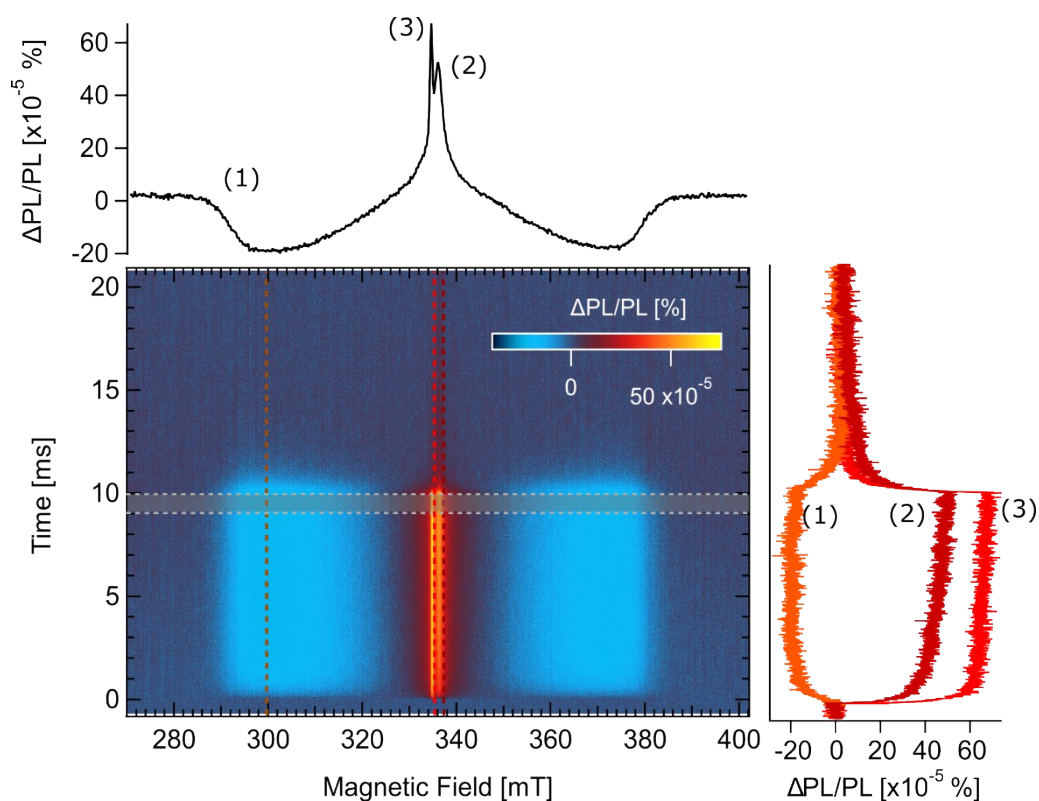

**Figure S1.** Transient PLDMR of a pristine ITIC film with exemplary transients (right) and spectrum (top), averaged over 9 – 10 ms. There are three superimposed spectral contributions: (1) A wide “wing-like” pattern ( $\sim 100$  mT wide,  $D = 1300$  MHz) that can be assigned to molecular ITIC triplet excitons. (2) A central CT/PP peak at  $B = 336.5$  mT with (3) an additional narrow spike at 334.8 mT. Measured with 473 nm laser excitation at  $T = 10$  K and MW pulse length of 10 ms.

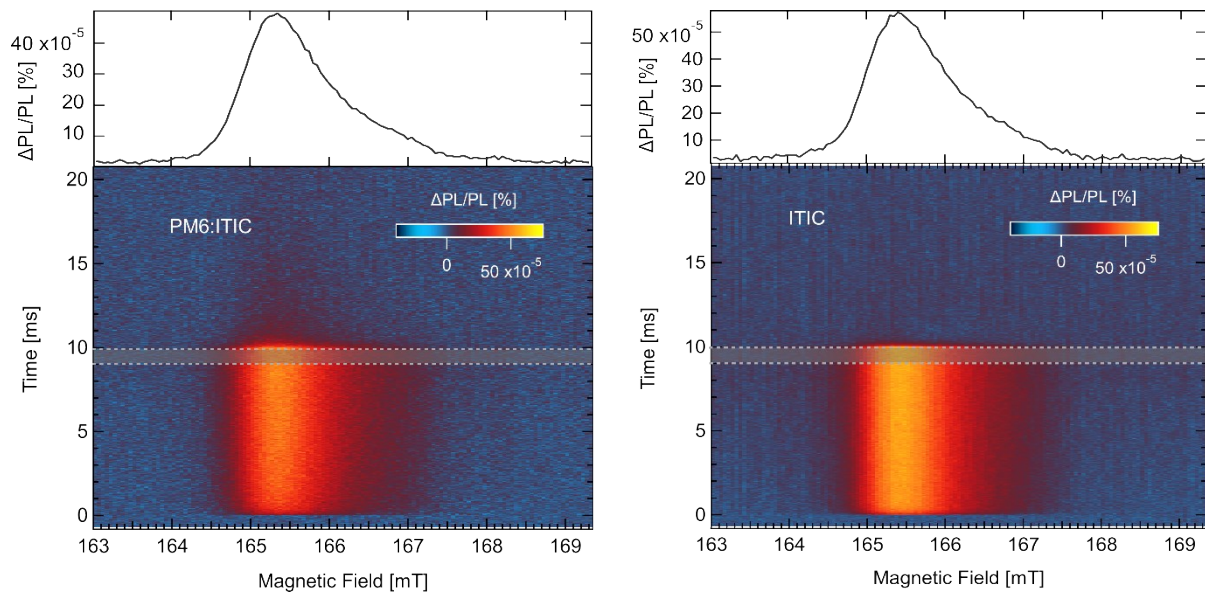

**Figure S2.** Transient PLDMR of the halffield (HF) signals of OPV blend PM6:ITIC blend (left) and pristine ITIC (right). Averaged spectra from 9 – 10 ms during microwave pulse are shown on top. Both signals have the same spectral position (g-factor), shape and comparable intensities. Measured with 473 nm laser excitation at  $T = 10$  K and MW pulse length of 10 ms.

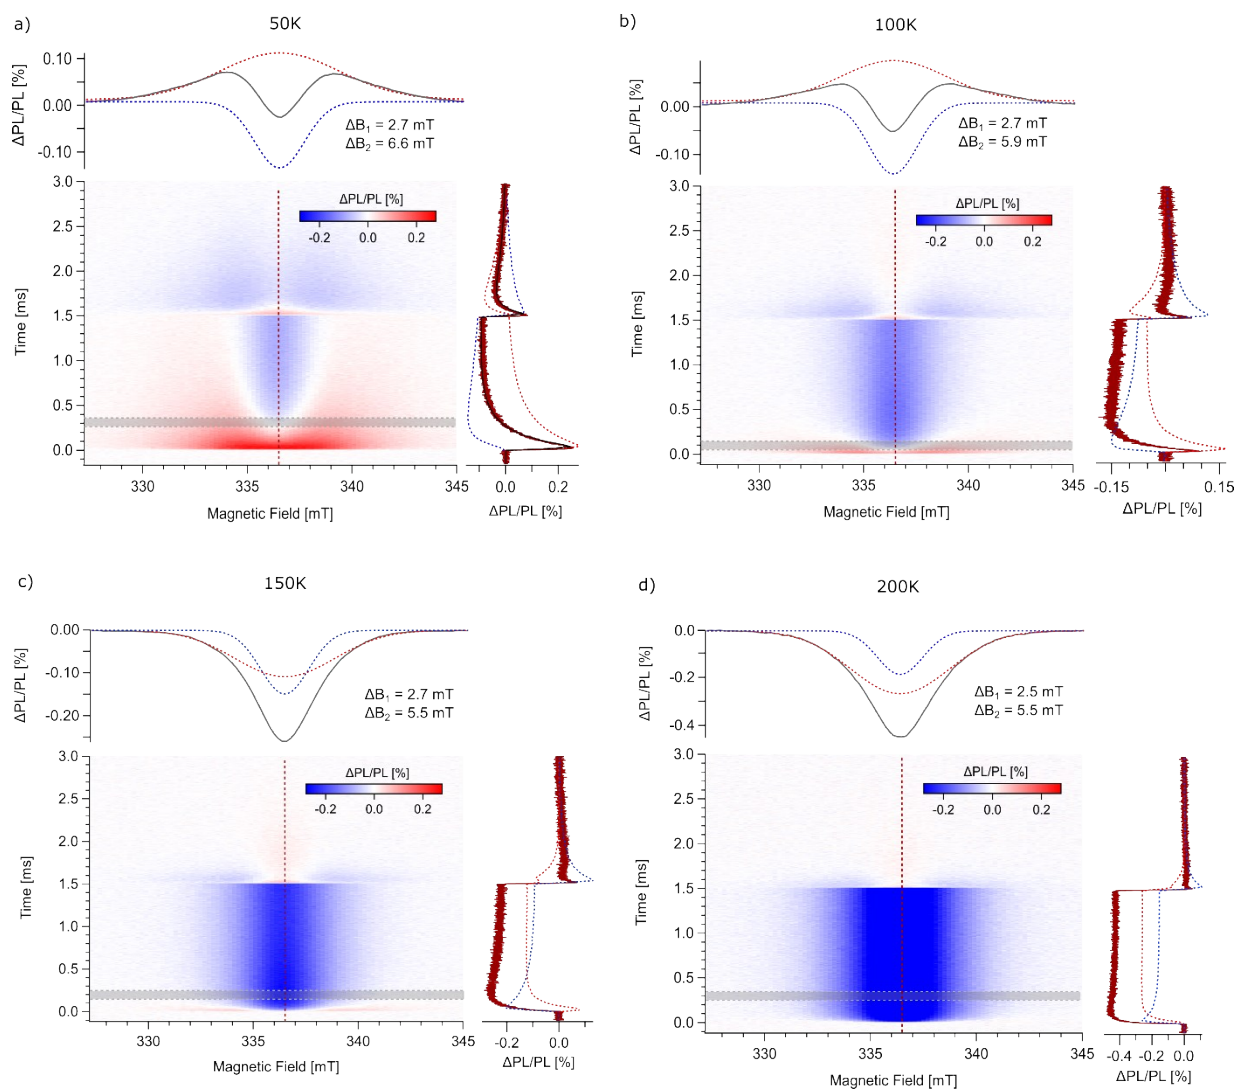

**Figure S3.** Transient PLDMR of OLED m-MTDATA:3TPYMB blend for 50 K, 100 K, 150 K and 200 K. During the 1.5 ms long microwave pulses, first, strong perturbations with changing signs are observed, before the intensities reach a new equilibrium under these conditions. Opposite trends are observed upon switching off the MW pulse. At all temperatures, signals of two triplet states and their time-dependent intensity traces can be extracted by a global fit with two Gaussian FWHM linewidths ( $\Delta B_1$ ,  $\Delta B_2$ ). The contribution of the narrower triplet signal  $\Delta B_1$  (blue) is always negative and switches sign afterwards. The contribution of the broader triplet signal  $\Delta B_2$  (red) is positive during the MW pulse at low temperatures and becomes more negative with increasing temperature or time. Measured with 365 nm LED excitation.
